# Supplementary figures and images for: Prevalence of self-reported chronic conditions and poor health among older adults with and without vision impairment in China: a nationally representative cross-sectional survey
Source: HighWire-hosted journal article supplement (doi:10.1136/bmjophth-2022-001211), 2023-03-01

**Figure S1. Potential pathways on the association between vision impairment and general health**

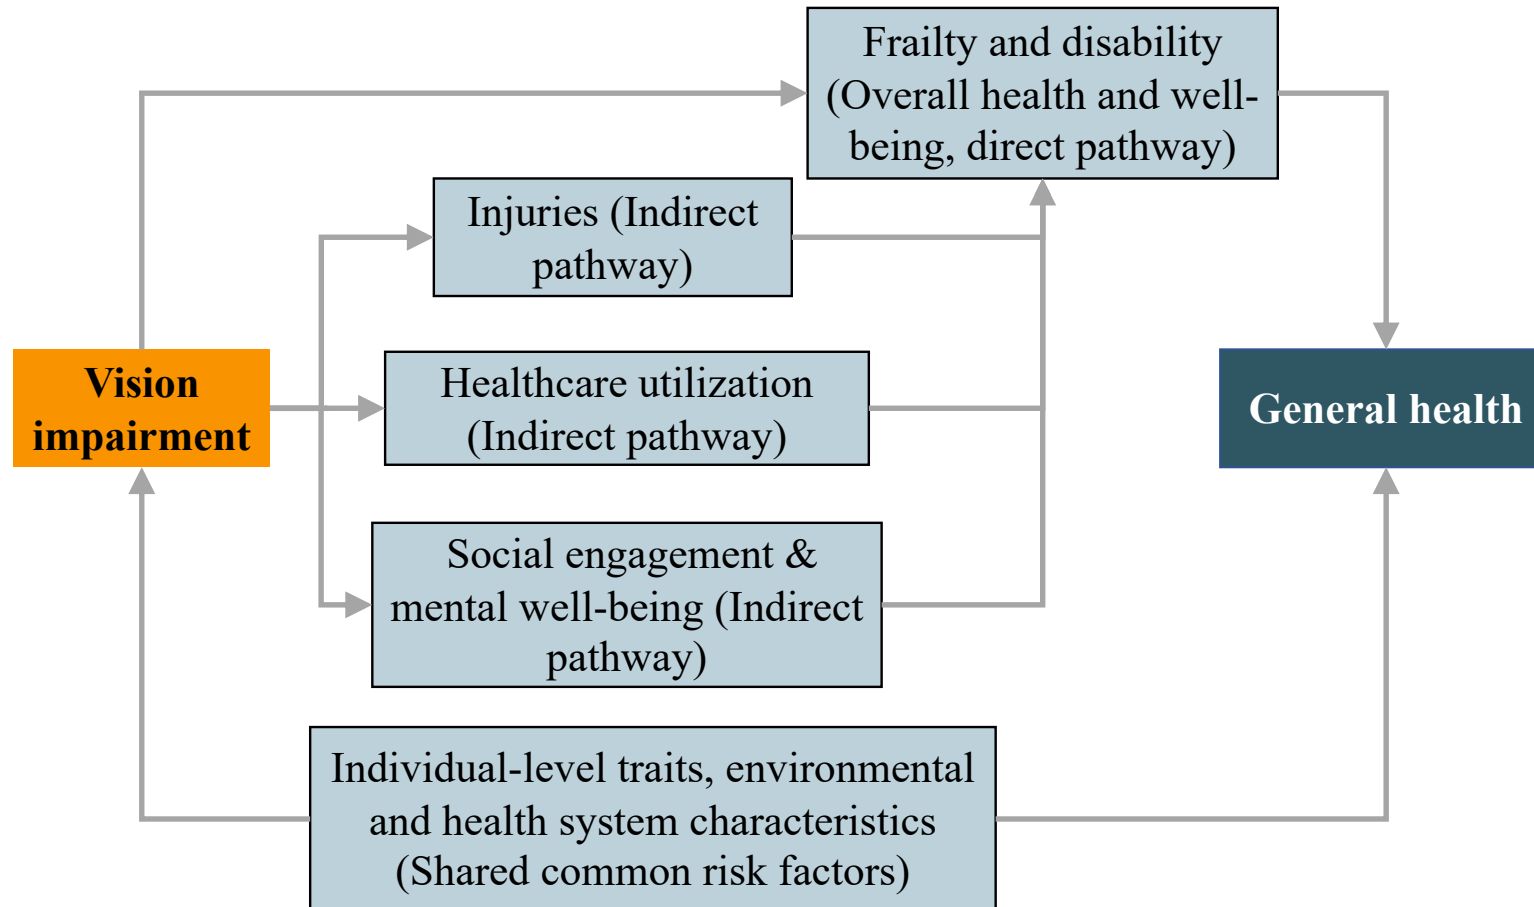

Supplement: bmjophth-2022-001211supp001_data_supplement.pdf [file bmjophth-2022-001211supp001_data_supplement.pdf]
